# Supplementary material
Source: publisher site journal article supplement (https://www.dovepress.com/article/348409)
Supplement: Supplementary file 1 [file get_supplementary_file.php]

**SUPPLEMENTAL MATERIAL**

**Supplemental Methods**

**Imaging data collection**

All brain MRI image data were delivered to the image research center at Beijing Tiantan Hospital for centrally and blindly reading. Two radiologists or neurologists interpreted all MRI images. A third analyzer addressed discrepancies between the two forms. In the current study, the presence of systematic intracranial stenosis (ICAS) was defined as 50% to 99% stenosis or occlusion of at least one of major intracranial artery segments relevant to the index event according to the Warfarin-Aspirin Symptomatic Intracranial Disease Trial (WASID) criteria (1). The etiologic classification of ischemic stroke was conducted according to the Org 10172 test in the Treatment of Acute Stroke (TOAST) criteria (2). Central stroke subtyping was performed by radiologists and neurologists as previously determined (3).

**APOE Genotype Testing**

The APOE genotypes (ε2/ε2, ε2/ε3, ε2/ε4, ε3/ε3, ε3/ε4, and ε4/ε4) were determined using single nucleotide polymorphisms (SNPs) rs429358 and rs7412, which were obtained by whole-genome sequencing (4).

**Mediation analysis**

To determine whether stroke recurrence could mediate the effect of increased IL-6 level on the risk of cognitive decline after stroke, we conducted a mediation analysis to calculate the proportion mediated and to test its significance. The total effect (TE) could be decomposed into two components: natural direct effect (NDE) and natural indirect effect (NIE) on the log scale of odds ratio (OR) (5,6). The mediation effect is measured by percentage mediated (PM), computed as NIE/TE*100% on the log odds ratio scale as well, which is the percentage of the total effect that is mediated by the mediator (7). Covariates in mediation analyses included demographics (age, sex), education level, body mass index, current smoking, heavy drinking, medical history (prior stroke/TIA, hypertension, diabetes mellitus, dyslipidemia, coronary artery disease), National Institutes of Health stroke scale (NIHSS) score at admission and symptomatic intracranial stenosis.

**Supplemental Tables**

**Supplementary Table 1 Proportion of association of IL-6 with cognitive decline mediated by follow-up stroke recurrence**

| Effect | Unadjusted analysis | | Adjusted analysis* | |
| --- | --- | --- | --- | --- |
| Estimate (95% CI) | P value | Estimate (95% CI) | P value |
| Total Effect (TE), Odds Ratio | 0.092(0.032-0.153) | 0.0028 | 0.097(0.031-0.163) | 0.0041 |
| Natural Direct Effect (NDE), Odds Ratio | 0.092(0.032-0.153) | 0.0028 | 0.097(0.031-0.163) | 0.0040 |
| Natural Indirect Effect (NIE), Odds Ratio | -0.0001(-0.002-0.002) | 0.9334 | -0.0002(-0.003-0.003) | 0.9131 |
| Percentage Mediated (PM) | -0.130(-3.171-2.912) | 0.9335 | -0.159(-3.022-2.703) | 0.9133 |

*Adjusted for age, sex, education level, body mass index, current smoking, heavy drinking, medical history of stroke, transient ischemic attack, hypertension, diabetes mellitus, dyslipidemia, coronary artery disease, National Institutes of Health stroke scale score at admission and intracranial artery stenosis.

IL-6 was classified into two groups, cutoff value was defined according to the first quartile (1.59 ng/L).

Abbreviations: IL-6= interleukin 6; CI= confidence intervals.

**Supplemental References**

1. Samuels OB, Joseph GJ, Lynn MJ, et al. A standardized method for measuring intracranial arterial stenosis. AJNR Am J Neuroradiol 2000;21:643-6.

2. Adams HP, Jr., Bendixen BH, Kappelle LJ, et al. Classification of subtype of acute ischemic stroke. Definitions for use in a multicenter clinical trial. TOAST. Trial of Org 10172 in Acute Stroke Treatment. Stroke 1993;24:35-41.

3. Suo Y, Jing J, Meng X, et al. Inconsistent centralised versus non-centralised ischaemic stroke aetiology. Stroke Vasc Neurol 2020;5:337-47.

4. Cheng S, Xu Z, Liu Y, et al. Whole genome sequencing of 10K patients with acute ischaemic stroke or transient ischaemic attack: design, methods and baseline patient characteristics. Stroke Vasc Neurol 2020.

5. Robins JM, Greenland S. Identifiability and exchangeability for direct and indirect effects. Epidemiology 1992;3:143-55.

6. Pearl J. Direct and indirect effects. Proceedings of the Seventeenth conference on Uncertainty in artificial intelligence; Seattle, Washington: Morgan Kaufmann Publishers Inc.; 2001. p. 411–20.

7. Vanderweele TJ, Vansteelandt S. Odds ratios for mediation analysis for a dichotomous outcome. Am J Epidemiol 2010;172:1339-48.
